# Supplementary material
Source: PubMed Central journal article supplement (PMC3223397)
Supplement: NIHMS35505-supplement-1.pdf [file NIHMS35505-supplement-1.pdf]

## **Supplementary Information**

Mitochondrial aging is accelerated by anti-retroviral therapy through the clonal expansion of mtDNA mutations

Brendan A I Payne, Ian J Wilson, Charlotte A Hateley, Rita Horvath, Mauro Santibanez-Koref, David C Samuels, D Ashley Price and Patrick F Chinnery.

## Supplementary Figure 1. Predicted COX defect according to cumulative NRTI exposure

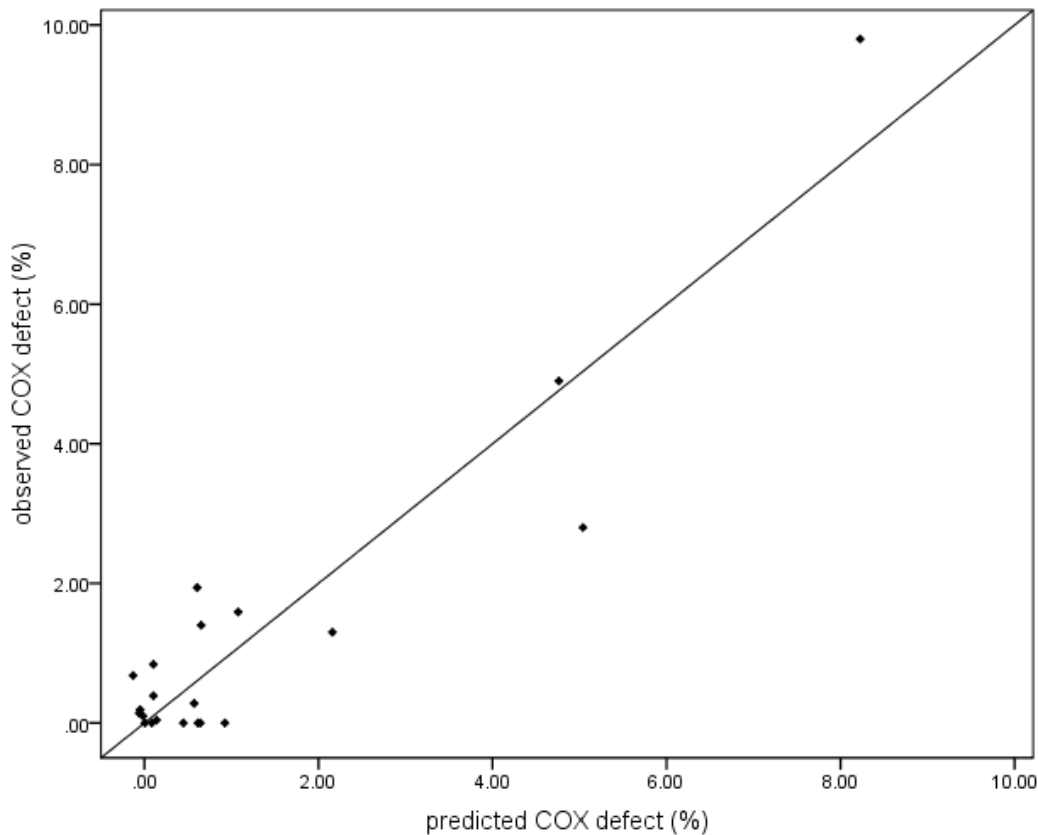

**Supplementary Figure 1.** Multivariate linear regression model of predicted percentage COX (cytochrome c oxidase) defects in skeletal muscle fibers from HIV-infected subjects, according to cumulative exposure to specific nucleoside analog anti-retroviral drugs (NRTIs). The inclusion in the model of cumulative (lifetime) exposure to those NRTIs implicated in perturbation of mtDNA replication (ddl, didanosine; ddC, zalcitabine; AZT, zidovudine; d4T, stavudine) was sufficient to explain 87% of the observed variation in COX defects ( $R = 0.93$ ). Equation of regression line =  $A + T_{ddl} B_{ddl} + T_{ddC} B_{ddC} + T_{AZT} B_{AZT} + T_{d4T} B_{d4T}$ . T, duration of exposure (months). Coefficients: constant (A) =  $-0.459 \pm 0.530$ ;  $B_{ddl} = 0.107 \pm 0.017$ ;  $B_{ddC} = 0.093 \pm 0.023$ ;  $B_{AZT} = 0.011 \pm 0.007$ ;  $B_{d4T} = 0.017 \pm 0.013$ . ddl ( $p < 0.001$ ) and ddC ( $p = 0.001$ ) were independently significantly associated with the proportion of COX deficient fibers. The p value for the model fit to the data is  $< 0.001$ .

## Supplementary Figure 2. MtDNA content in homogenized skeletal muscle

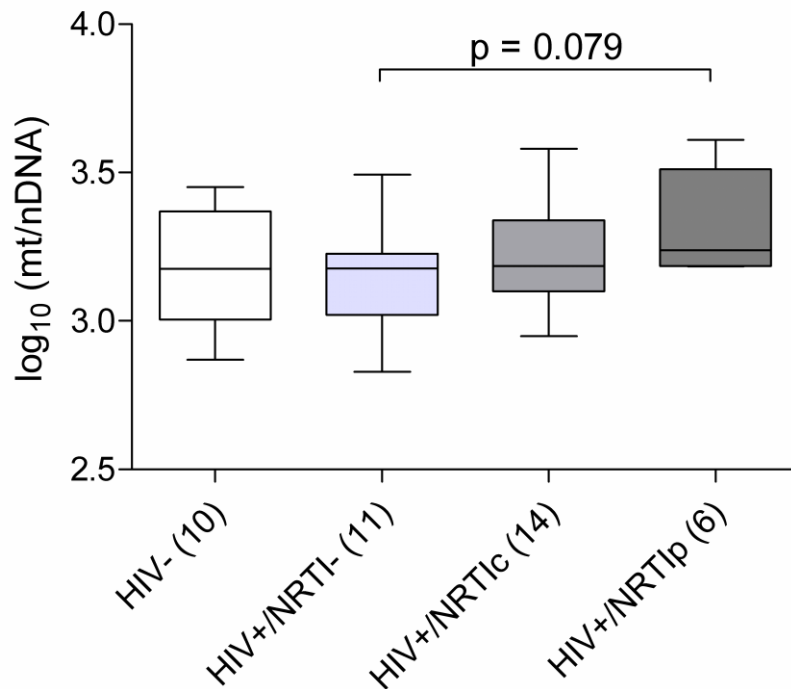

**Supplementary Figure 2.** Relative mitochondrial DNA (mean  $\log_{10}$  (mt/nDNA)  $\pm$ SEM) content in homogenized skeletal muscle. HIV-, uninfected controls (n=10;  $3.17 \pm 0.06$ ); HIV+/NRTI-, treatment-naïve (n=11;  $3.15 \pm 0.05$ ); HIV+/NRTIc, currently treated with relevant nucleoside analog drug (n=14, all with AZT (zidovudine) exposure only;  $3.22 \pm 0.05$ ); HIV+/NRTIp, *prior* (but not current) exposure to relevant NRTIs (n=6, with prior AZT, d4T (stavudine), ddl (didanosine) and / or ddC (zalcitabine) exposure;  $3.31 \pm 0.07$ ). There was therefore no evidence of persistent mtDNA depletion in HIV+/NRTIp subjects, in fact previously treated patients showed a trend towards higher mean mtDNA content compared with HIV+/NRTI- ( $p = 0.079$ ).

### Supplementary Figure 3. Determination of experimental noise in UDS assay

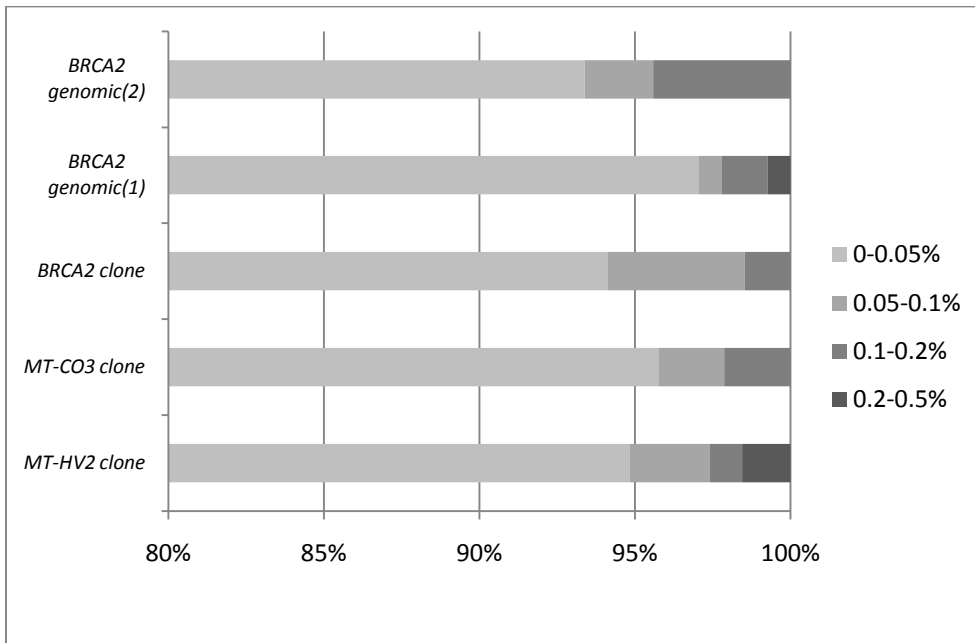

**Supplementary Figure 3.** Demonstration of low level of background noise in ultra-deep re-sequencing-by-synthesis (UDS, Roche 454 GS FLX) assay by study of autosomal genomic DNA (*BRCA2* amplicon) and cloned DNA (mtDNA hypervariable segment 2, *MT-HV2*; mtDNA COX subunit 3, *MT-CO3*; and *BRCA2*). Very few base positions (0.5% of total) demonstrate >0.2% variance frequency on UDS assay, confirming low intrinsic background noise, as well as no systematic difference in noise between autosomal and mtDNA amplicons.

## Supplementary Figure 4. UDS replication experiment

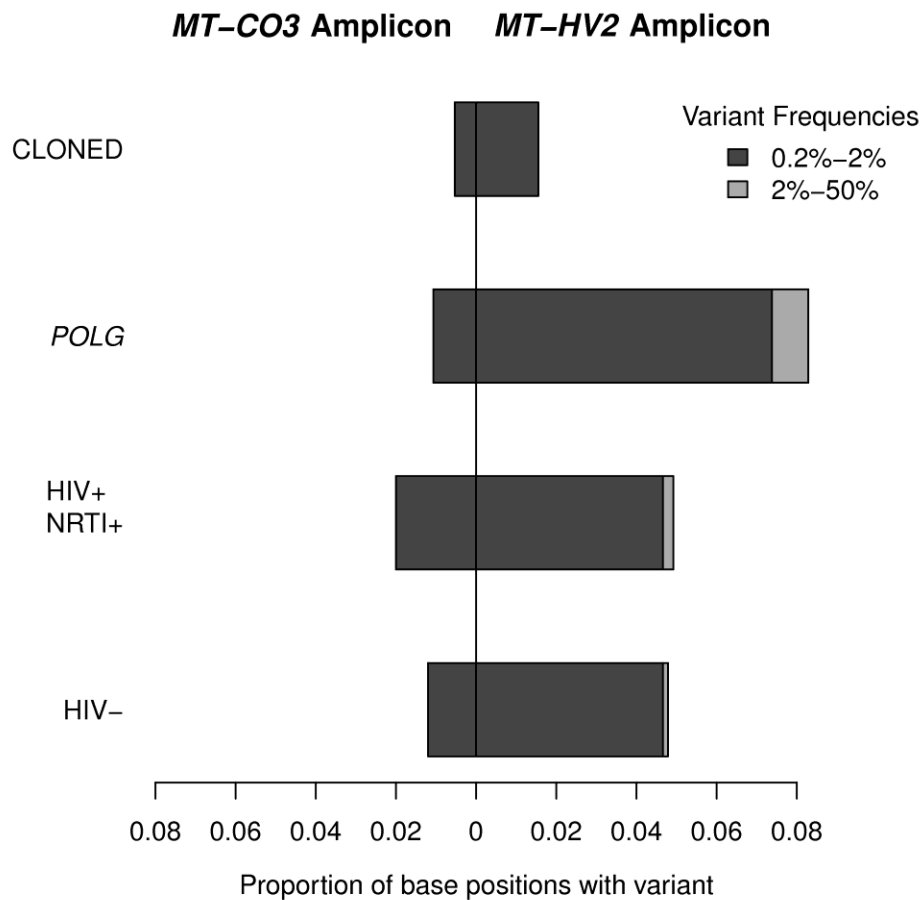

**Supplementary Figure 4.** Ultra-deep re-sequencing-by-synthesis (UDS) replication experiment (Roche 454 GS FLX Titanium). Comparison of point mutation burden (>0.2% variant frequency) in skeletal muscle DNA extract from HIV-uninfected controls (HIV-), NRTI-treated HIV-infected (HIV+/NRTI+) subjects and patients with inherited defects of *POLG* (n=4 each) as well as cloned DNA. Two amplicons were located in mtDNA hypervariable segment 2 (*MT-HV2*) and mtDNA COX subunit 3 (*MT-CO3*). Subjects with inherited *POLG* defects show increased burden of low-level mutations compared with healthy controls in *MT-HV2* (OR 2.00, p =0.001), whereas HIV+/NRTI+ subjects do not.

**Supplementary Table 1. Subject demographic and treatment details.**

NRTI, history of nucleoside analogue reverse transcriptase inhibitor exposure; ART, anti-retroviral therapy; LDS, anti-retroviral-associated lipodystrophy syndrome. Polymerase  $\gamma$  inhibiting NRTIs: AZT, zidovudine; d4T, stavudine; ddl, didanosine; ddC, zalcitabine. Other ART: 3TC, lamivudine; FTC, emtricitabine; ABC, abacavir; TDF, tenofovir; NVP, nevirapine; EFV, efavirenz; SQV, saquinavir; IDV, indinavir; NFV, nelfinavir; RTV, ritonavir (therapeutic dosing); /r, ritonavir (pharmacokinetic boosting dosing); ATV, atazanavir; LPV, lopinavir; RAL, raltegravir. COX defect, proportion of cytochrome *c* oxidase deficient skeletal muscle fibers.



**Supplementary Table 2. MtDNA deletion break-points in single muscle fibers**

Sequence break-points for large scale mitochondrial DNA (mtDNA) deletions identified in individual COX (cytochrome c oxidase) deficient skeletal muscle fibers from nucleoside analog (NRTI) treated, HIV-infected subjects. Deletion shown as nucleotide positions (rCRS) and size of sequence overlap (where present). Bracketed nucleotides, sequence overlap (where repeat appears once only in the deleted molecule); bold italic nucleotides, partial mismatch in overlap sequences.

| <i>Subject</i> | <b>Deletion</b> | <b>Size</b> | <b>Flanking sequence</b>                                                        |
|----------------|-----------------|-------------|---------------------------------------------------------------------------------|
| 18             | 8145-8-14379    | 6243bp      | AAACCACTTT(CACCGCTA)-(CATCGCTA)ACCCCACTAAAA                                     |
| 18             | 8246---14603    | 6358bp      | AAAAATCTTTGA-AGGCTTAGAAGAAAA                                                    |
| 18             | 9924-2-16070    | 6149bp      | CGAAGCCGCCG(CC)-(CC)CATCAACAACCG                                                |
| 18             | 8718---14298    | 5581bp      | TACACAACACTAA-TATTCAGCTTCCTA                                                    |
| 18             | 8483-13-13446   | 4977bp      | AAACTACCACCT(ACCTCCCTCACCA)-(ACCTCCCTCACCA)TTGGCAGCCTAGCA                       |
| 18             | 9011-12-14931   | 5933bp      | AGCCCTGGCCGT(ACGCCTAACCGC)-(ACGCCT <b>CAACCGC</b> )CTTTTCATCAATC                |
| 18             | 7376---13406    | 6031bp      | AACCCTCCATAAA-AAAAATAGGAGGACT                                                   |
| 20             | 7106-11-12082   | 4988bp      | ATTCAGTATT(TCCCC <b>TATTCT</b> )-(TCCCC <b>CATTCT</b> )CCTCCTATCCC              |
| 20             | 7960-12-14481   | 6534bp      | TTCAACTCCTA(CATA <b>ACTTCCCCC</b> )-(CAT <b>CAATTCCCCC</b> )TAAATAAATTAATAAAAAA |
| 15             | 7129-14-13991   | 6877bp      | TCAGGCTACAC(CCTAGACCA <b>AAACCT</b> )-(CCTAGACCT <b>TAACCT</b> )GACTAGAAAA      |
| 15             | 8035-11-11422   | 3399bp      | TACTCCCGATT(GAAGCCCCCAT)-(GAAGCCCCCAT)CGCTGGGTCAATA                             |
| 12             | 8483-13-13446   | 4977bp      | AAACTACCACCT(ACCTCCCTCACCA)-(ACCTCCCTCACCA)TTGGCAGCCTAGCA                       |
| 12             | 6942---14816    | 7875bp      | AGGATTCATCTTTC-CATCCAACATCTCC                                                   |
| 12             | 6071---12499    | 6429bp      | CCACATCTACAACGTT-TGTGCCTAGACCAAGAA                                              |
| 12             | 8936---16070    | 7135bp      | CACCTACACCCC-CCCATCAACAACC                                                      |



**Supplementary Table 3. UDS (Roche 454 FLX GS) outputs** (separate file).

Variance and read depth detected at individual base positions in mtDNA hypervariable segment 2 (*MT-HV2*), COX subunit 3 (*MT-CO3*) and autosomal (*BRCA2*) amplicons, for skeletal muscle DNA extracts from HIV-infected NRTI-treated subjects (HIV+/NRTI+, n=8), HIV-infected untreated subjects (HIV+/NRTI-, n=4), HIV-uninfected healthy controls (HIV-, n=4), subjects with *POLG* defects (*POLG*, n=4) and cloned DNA.

Raw 454 Flowgram output is available from the authors.

## Supplementary Table 4. Primers.

All mitochondrial nucleotide positions refer to revised Cambridge Reference Sequence (rCRS, NC\_012920).

### Long-range PCR from single skeletal muscle fibers

Primary PCR: forward primer, nt5855-5875 (AGATTTACAGTCCAATGCTTC);  
reverse primer, nt129-110 (AGATACTGCGACATAGGGTG).

Secondary PCR: forward primer, nt6358-6377 (TAGCAGGTGTCTCCTCTATC);  
reverse primer, nt20-1 (AGGGTGATAGACCTGTGATC).

### Real-time PCR from skeletal muscle homogenate and single fibers

*B2M* (nuclear): forward primer, nt9145-9166 (CACTGAAAAAGATGAGTATGCC);  
reverse primer, nt9375-9357 (AACATTCCTGACAATCCC).

*MT-ND1*: forward primer, nt3458-3481 (ACGCCATAAACTCTTCACCAAAG);  
reverse primer, nt3569-3546 (GGGTTCATAGTAGAAGAGCGATGG).

*MT-ND4*: forward primer, nt11144-11165 (ACCTTGGCTATCATCACCCGAT);  
reverse primer, nt11250-11230 (AGTGCGATGAGTAGGGGAAGG).

CD: forward primer, nt8393-8414 (CCCACCATAATTACCCCATAC)  
reverse primer, nt13509-13486 (GGAGTAGAAACCTGTGAGGAAAGG)

### Whole mtDNA genome sequencing from single skeletal muscle fibers

| Primary PCR               | nt          |
|---------------------------|-------------|
| AF GCTCACATCACCCATAAAC    | 627-646     |
| AR CTCGTCTTGCTGTGTTATGC   | 2721-2702   |
| BF ACCAACAAGTCATTATTACCC  | 2395-2415   |
| BR ATACTTGATGGCAGCTTCTG   | 4646-4627   |
| CF GTCAGCTAAATAAGCTATCGG  | 4408-4428   |
| CR GGACGGATCAGACGAAGAG    | 6468-6450   |
| DF AATACCCATCATAATCGGAGG  | 6113-6133   |
| DR GGTGATGAGGAATAGTGTAAG  | 8437-8417   |
| EF TCAATGCTCTGAAATCTGTGG  | 8167-8187   |
| ER TCGAAGCCGCACTCGTAAG    | 10183-10165 |
| FF CTATTGATGAGGGTCTTACTC  | 9974-9994   |
| FR GAGCTTTCTCGGTAAATAAGG  | 12216-12196 |
| GF CTGTGCTAGTAACCACGTTT   | 11898-11917 |
| GR GGTAGAATCCGAGTATGTTGG  | 13924-13904 |
| HF TATTCGCAGGATTTCTCATTAC | 13721-13742 |
| HR GTGCTAATGGTGGAGTTAAAG  | 15989-15969 |
| IF CCCATCCTCCATATATCCAAAC | 15659-15680 |
| IR TCACTGCTGTTTCCCGTGG    | 823 -805    |

## Secondary PCR

Forward primers with M13 tag for cycle sequencing (TGTA AACGACGGCCAGT)

|                                              |             |
|----------------------------------------------|-------------|
| 1F TGTA AACGACGGCCAGTTCACCCCTCTAAATCACCACG   | 721-740     |
| 2F TGTA AACGACGGCCAGTTTAAAACTCAAAGGACCTGGC   | 1157-1177   |
| 3F TGTA AACGACGGCCAGTAACTTAACTTGACCGCTCTGAG  | 1650-1671   |
| 4F TGTA AACGACGGCCAGTACTGTTAGTCCAAAGAGGAAC   | 2091-2111   |
| 5F TGTA AACGACGGCCAGTCAGTGACACATGTTTAAACGGC  | 2549-2569   |
| 6F TGTA AACGACGGCCAGTCAGCCGCTATTAAAGGTTTCG   | 3017-3036   |
| 7F TGTA AACGACGGCCAGTACCATCACCCCTCTACATCAC   | 3505-3524   |
| 8F TGTA AACGACGGCCAGTTCGCCCTATTCTTCATAGCC    | 3965-3984   |
| 9F TGTA AACGACGGCCAGTACACTCATCACAGCGCTAAG    | 4518-4537   |
| 10F TGTA AACGACGGCCAGTCTCACTCTCTCAATCTTATCC  | 4932-4952   |
| 11F TGTA AACGACGGCCAGTACCTCAATCACACTACTCCC   | 5367-5386   |
| 12F TGTA AACGACGGCCAGTAGATTTACAGTCCAATGCTTC  | 5855-5875   |
| 13F TGTA AACGACGGCCAGTTAGCAGGTGTCTCTCTATC    | 6358-6377   |
| 14F TGTA AACGACGGCCAGTATTTAGCTGACTCGCCACAC   | 6863-6882   |
| 15F TGTA AACGACGGCCAGTGGCTCATTCTCTCTAACAG    | 7272-7293   |
| 16F TGTA AACGACGGCCAGTTCCTAACACTCACAACAAAAC  | 7713-7723   |
| 17F TGTA AACGACGGCCAGTACAGTTTCATGCCCATCGTC   | 8196-8215   |
| 18F TGTA AACGACGGCCAGTACCACCCAACAATGACTAATC  | 8656-8676   |
| 19F TGTA AACGACGGCCAGTATCCTAGAAATCGCTGTGCGC  | 9127-9146   |
| 20F TGTA AACGACGGCCAGTCATCCGTATTACTCGCATCAG  | 9607-9627   |
| 21F TGTA AACGACGGCCAGTCAACACCCTCCTAGCCTTAC   | 10085-10104 |
| 22F TGTA AACGACGGCCAGTATCGCTCACACCTCATATCC   | 10534-10553 |
| 23F TGTA AACGACGGCCAGTTATCCAGTGAACCACTATCAC  | 11010-11030 |
| 24F TGTA AACGACGGCCAGTTCCTGTACTATCCCTATGAG   | 11541-11561 |
| 25F TGTA AACGACGGCCAGTCTCCCTCTACATATTTACCAC  | 11977-11997 |
| 26F TGTA AACGACGGCCAGTCTCTTCCCACAACAATATTC   | 12478-12498 |
| 27F TGTA AACGACGGCCAGTGCCCTTCTAAACGCTAATCC   | 12940-12959 |
| 28F TGTA AACGACGGCCAGTCGGGTCCATCATCCACAAC    | 13365-13383 |
| 29F TGTA AACGACGGCCAGTACCTAAAACCTCACAGCCCTC  | 13790-13809 |
| 30F TGTA AACGACGGCCAGTATTAAGTTTACCACAACCACC  | 14317-14341 |
| 31F TGTA AACGACGGCCAGTATTCATCGACCTCCCCACC    | 14797-14815 |
| 32F TGTA AACGACGGCCAGTCATCTTGCCCTTCATTATTGC  | 15295-15315 |
| D1F TGTA AACGACGGCCAGTATCGGAGGACAACCAGTAAG   | 15758-15777 |
| D2F TGTA AACGACGGCCAGTCTCAACTATCACACATCAACTG | 16223-16244 |
| D3F TGTA AACGACGGCCAGTCCTTAAATAAGACATCACGATG | 16548-16569 |
| D4F TGTA AACGACGGCCAGTGCCACAGCACTTAAACACATC  | 323-343     |

Reverse primers with M13 tag (CAGGAAACAGCTATGACC)

|                                            |            |
|--------------------------------------------|------------|
| 1R CAGGAAACAGCTATGACCGATGGCGGTATATAGGCTGAG | 1268-1248  |
| 2R CAGGAAACAGCTATGACCCTGGTAGTAAGGTGGAGTGGG | 1709-1689  |
| 3R CAGGAAACAGCTATGACCATTGGTGGCTGCTTTTAGG   | 2193-2175  |
| 4R CAGGAAACAGCTATGACCTCGTGGAGCCATTCATACAG  | 2644-2625  |
| 5R CAGGAAACAGCTATGACCGATTACTCCGGTCTGAACTC  | 3087-3068  |
| 6R CAGGAAACAGCTATGACCGGAGGGGGTTCATAGTAG    | 3374- 3356 |

|                                              |             |
|----------------------------------------------|-------------|
| 7R CAGGAAACAGCTATGACCAGAGTGCATATGTTGTTTC     | 4057-4037   |
| 8R CAGGAAACAGCTATGACCGTTTATTTCTAGGCCTACTCAG  | 4577-4556   |
| 9R CAGGAAACAGCTATGACCGATTTTGCCTAGCTGGGTTTG   | 5003-4983   |
| 10R CAGGAAACAGCTATGACCTGTAGGAGTAGCGTGGTAAGG  | 5481-5462   |
| 11R CAGGAAACAGCTATGACCTAGTCAACGGTCGGCGAAC    | 5924-5906   |
| 12R CAGGAAACAGCTATGACCATGGCAGGGGGTTTTATATTG  | 6430-6410   |
| 13R CAGGAAACAGCTATGACCAAGAAAGATGAATCCTAGGGC  | 6944-6924   |
| 14R CAGGAAACAGCTATGACCCATCCATATAGTCACTCCAGG  | 7396-7376   |
| 15R CAGGAAACAGCTATGACCGGCAGGATAGTTCAGACGG    | 7791-7773   |
| 16R CAGGAAACAGCTATGACCTACAGTGGGCTCTAGAGGG    | 8301-8283   |
| 17R CAGGAAACAGCTATGACCGTATAAGAGATCAGGTTTCGTC | 8740-8720   |
| 18R CAGGAAACAGCTATGACCGTTGTCGTGCAGGTAGAGG    | 9201-9183   |
| 19R CAGGAAACAGCTATGACCATTAGACTATGGTGAGCTCAG  | 9661-9641   |
| 20R CAGGAAACAGCTATGACCTAGCCGTTGAGTTGTGGTAG   | 10147-10128 |
| 21R CAGGAAACAGCTATGACCAGGCACAATATTGGCTAAGAG  | 10649-10629 |
| 22R CAGGAAACAGCTATGACCATGATTAGTTCTGTGGCTGTG  | 11109-11089 |
| 23R CAGGAAACAGCTATGACCTAGGTCTGTTTGTCTAGGC    | 11605-11586 |
| 24R CAGGAAACAGCTATGACCCGTGTGAATGAGGGTTTTATG  | 12054-12034 |
| 25R CAGGAAACAGCTATGACCGTGGCTCAGTGTCAAGTTTCG  | 12545-12527 |
| 26R CAGGAAACAGCTATGACCCTGATTTGCCTGCTGCTGC    | 13009-12991 |
| 27R CAGGAAACAGCTATGACCGGGAGGTTGAAGTGAGAGG    | 13453-13435 |
| 28R CAGGAAACAGCTATGACCGTTAGGTAGTTGAGGTCTAGG  | 13859-13839 |
| 29R CAGGAAACAGCTATGACCAGGATTGGTGCTGTGGGTG    | 14374-14356 |
| 30R CAGGAAACAGCTATGACCAAGGAGTGAGCCGAAGTTTC   | 14857-14838 |
| 31R CAGGAAACAGCTATGACCGGTTGTTTGATCCCGTTTCG   | 15368-15349 |
| 32R CAGGAAACAGCTATGACCTACAAGGACAGGCCCATTTG   | 15896-15877 |
| D1R CAGGAAACAGCTATGACCAGGGTGATAGACCTGTGATC   | 19-1        |
| D2R CAGGAAACAGCTATGACCAGATACTGCGACATAGGGTG   | 129-110     |
| D3R CAGGAAACAGCTATGACCCTGGTTAGGCTGGTGTTAGG   | 389-370     |
| D4R CAGGAAACAGCTATGACCTGCTGCGTGCTTGATGCTTG   | 771-752     |

## Amplicon generation for ultra-deep sequencing-by-synthesis (454 GS FLX)

Primers comprised a sequence-specific segment, a barcode, and a fusion primer segment.

### Sequence-specific segments

*MT-HV2*: forward, nt162-184 (CGCACCTACGTTCAATATTACAG)  
reverse, nt455-434 (AAAATAATGTGTTAGTTGGGGG)  
*MT-CO3*: forward, nt9307-9329 (GATTTCACTTCCACTCCATAACG)  
reverse, nt9591-9572 (CTTCTAGGGGATTTAGCGGG)

### Fusion primer segments

Forward: GCCTCCCTCGCGCCATCAG  
Reverse: GCCTTGCCAGCCCGCTCAG

### Barcode segments

|    |           |    |           |
|----|-----------|----|-----------|
| 1  | AAGGAAGGT | 15 | TTACGTCCT |
| 2  | TTAAGGACT | 16 | ACTTAAGGT |
| 3  | TAAGGCCGT | 17 | TTACTTACT |
| 4  | TTAAGTAAT | 18 | TACTTCCGT |
| 5  | TAAGTACGT | 19 | TCCGGAAGT |
| 6  | AAGTCCGGT | 20 | CCGGACGGT |
| 7  | TAATTAAGT | 21 | TTCCGGCCT |
| 8  | AATTACGGT | 22 | CCGTAAGGT |
| 9  | TTAATTACT | 23 | TTCCGTACT |
| 10 | TTACGGAAT | 24 | TCCGTCCGT |
| 11 | TACGGACGT | 25 | TTCCTTAAT |
| 12 | ACGGCCGGT | 26 | TCCTTACGT |
| 13 | TACGTAAGT | 27 | CCTTCCGGT |
| 14 | ACGTACGGT |    |           |

## **Amplicon generation for ultra-deep sequencing-by-synthesis (454 GS FLX Titanium)**

Primers comprised a sequence-specific segment, a barcode, and a fusion primer segment.

### **Sequence-specific segments**

*HVS2*: forward, nt.109-130 (GCACCCTATGTCGCAGTATCTG)  
reverse, nt.483-458 (GAGATTAGTAGTATGGGAGTGGGAGG)  
*CO3*: forward, nt.9304-9329 (TGTGATTTCACTTCCACTCCATAACG)  
reverse, nt.9653-9629 (ATGGTGAGCTCAGGTGATTGATACT)

### **Barcode segments**

1 ACGAGTGCCT  
2 ACGCTCGACA  
3 AGACGCACTC  
4 AGCACTGTAG

### **Fusion primer segments**

Forward: CGTATCGCCTCCCTCGCGCCATCAG  
Reverse: CTATGCGCCTTGCCAGCCCGCTCAG

## Supplementary Note.

### Clinical Data

All subjects were aged 50 years or below as no COX defect would be expected in skeletal muscle of healthy individuals in this age group<sup>4</sup>. All subjects gave informed consent to participation in the study. HIV-infected subjects were classified based on cumulative (lifetime) anti-retroviral drug exposure as HIV-infected, treatment naïve (HIV+/NRTI-) or as nucleoside analogue exposed (HIV+/NRTI+). We predicted that those NRTIs documented to disrupt mtDNA replication through pol  $\gamma$  inhibition may affect somatic mtDNA mutation<sup>9,36</sup>. Therefore all HIV+/NRTI+ subjects studied had history of exposure to at least one of the following NRTIs: zidovudine (AZT), stavudine (d4T), didanosine (ddl) and / or zalcitabine (ddC). Full subject treatment histories are presented in **Supplementary Table 1**. HIV-infected subjects were unselected with respect to the presence or absence of clinical complications of anti-retroviral therapy. Subjects with history of (non-HIV-related) neuromuscular disease, diabetes mellitus or chronic viral hepatitis were specifically excluded.

Lower limb skeletal muscle biopsies from HIV-infected subjects were obtained under local anesthesia. Open biopsies were obtained from HIV-uninfected control subjects (HIV-) at the time of elective orthopedic surgery. Samples were snap-frozen in the liquid phase of isopentane, cooled by liquid nitrogen, within 20 minutes of sampling.

Four patients with inherited defects of *POLG* were used as positive controls for UDS assay. Two of these patients (both 56 year old females) carried a compound heterozygous mutation, R627Q / W748S; one patient (17 year old male) carried compound heterozygous mutation, R627Q / R1096H; and one patient (45 year old female) carried homozygous A467T. All *POLG* patients showed minimal histochemical COX defects.

### Supplementary references

4. Brierley, E.J., Johnson, M.A., James, O.F. & Turnbull, D.M. Effects of physical activity and age on mitochondrial function. *Qjm* **89**, 251-8 (1996).
9. Lim, S.E. & Copeland, W.C. Differential incorporation and removal of antiviral deoxynucleotides by human DNA polymerase gamma. *J Biol Chem* **276**, 23616-23 (2001).
36. Martin, A.M. et al. Accumulation of mitochondrial DNA mutations in human immunodeficiency virus-infected patients treated with nucleoside-analogue reverse-transcriptase inhibitors. *Am J Hum Genet* **72**, 549-60 (2003).
