# Supplementary material
Source: PubMed Central journal article supplement (PMC3223397)
Supplement: NIHMS35505-supplement-2.pdf [file NIHMS35505-supplement-2.pdf]

Table with columns for Subject, MT-CO3 seq, P1-P4, HV-20 to HV-39, and clone. The table lists 957 variants across various subjects (C, T, A, G) with their respective genetic sequences.





| position Chr13 | seq | BRCA2 (genomic 1) |         | BRCA2 (genomic 2) |         | BRCA2 (clonal) |         |
|----------------|-----|-------------------|---------|-------------------|---------|----------------|---------|
|                |     | coverage          |         | coverage          |         | coverage       |         |
| 32907125       | T   | 53488             | 0.0000% | 6906              | 0.0000% | 12264          | 0.0245% |
| 32907126       | C   | 53489             | 0.0019% | 6906              | 0.0145% | 12264          | 0.0082% |
| 32907127       | T   | 53491             | 0.0150% | 6906              | 0.0000% | 12264          | 0.0163% |
| 32907128       | A   | 53491             | 0.0000% | 6906              | 0.0000% | 12264          | 0.0000% |
| 32907129       | T   | 53492             | 0.0019% | 6906              | 0.0290% | 12264          | 0.0082% |
| 32907130       | A   | 53495             | 0.0019% | 6906              | 0.0000% | 12264          | 0.0000% |
| 32907131       | T   | 53499             | 0.0019% | 6906              | 0.0000% | 12264          | 0.0082% |
| 32907132       | T   | 53500             | 0.0075% | 6906              | 0.1448% | 12264          | 0.1223% |
| 32907133       | C   | 53501             | 0.0075% | 6906              | 0.0000% | 12264          | 0.0163% |
| 32907134       | A   | 53503             | 0.0224% | 6906              | 0.0145% | 12264          | 0.0326% |
| 32907135       | G   | 53561             | 0.0000% | 6906              | 0.0145% | 12264          | 0.0082% |
| 32907136       | A   | 53575             | 0.0019% | 6906              | 0.0145% | 12264          | 0.0000% |
| 32907137       | A   | 53584             | 0.0093% | 6906              | 0.0290% | 12264          | 0.0000% |
| 32907138       | T   | 53584             | 0.0037% | 6906              | 0.0000% | 12264          | 0.0000% |
| 32907139       | A   | 53585             | 0.0000% | 6906              | 0.0000% | 12264          | 0.0000% |
| 32907140       | A   | 53586             | 0.0056% | 6906              | 0.0000% | 12264          | 0.0000% |
| 32907141       | G   | 53586             | 0.0019% | 6906              | 0.0145% | 12264          | 0.0000% |
| 32907142       | A   | 53587             | 0.0019% | 6906              | 0.0145% | 12264          | 0.0000% |
| 32907143       | G   | 53588             | 0.0000% | 6906              | 0.0145% | 12264          | 0.0163% |
| 32907144       | A   | 53588             | 0.0037% | 6906              | 0.0000% | 12264          | 0.0082% |
| 32907145       | A   | 53589             | 0.0000% | 6906              | 0.0000% | 12264          | 0.0000% |
| 32907146       | T   | 53589             | 0.0000% | 6906              | 0.0000% | 12264          | 0.0000% |
| 32907147       | C   | 53590             | 0.0000% | 6906              | 0.0145% | 12264          | 0.0000% |
| 32907148       | A   | 53591             | 0.0000% | 6906              | 0.0000% | 12264          | 0.0000% |
| 32907149       | C   | 53592             | 0.0000% | 6906              | 0.0000% | 12264          | 0.0000% |
| 32907150       | C   | 53592             | 0.0019% | 6906              | 0.0000% | 12264          | 0.0245% |
| 32907151       | T   | 53592             | 0.0000% | 6906              | 0.0434% | 12264          | 0.0163% |
| 32907152       | A   | 53592             | 0.0000% | 6906              | 0.0000% | 12264          | 0.0000% |
| 32907153       | A   | 53592             | 0.0000% | 6906              | 0.0000% | 12264          | 0.0000% |
| 32907154       | A   | 53592             | 0.0019% | 6906              | 0.0579% | 12264          | 0.0245% |
| 32907155       | G   | 53592             | 0.0000% | 6906              | 0.0290% | 12264          | 0.0245% |
| 32907156       | A   | 53592             | 0.0000% | 6906              | 0.0000% | 12264          | 0.0082% |
| 32907157       | G   | 53592             | 0.0000% | 6906              | 0.0000% | 12264          | 0.0000% |
| 32907158       | A   | 53592             | 0.0000% | 6906              | 0.0145% | 12264          | 0.0000% |
| 32907159       | C   | 53592             | 0.0019% | 6906              | 0.0290% | 12264          | 0.0408% |
| 32907160       | T   | 53592             | 0.0000% | 6906              | 0.0145% | 12264          | 0.0000% |
| 32907161       | T   | 53592             | 0.0000% | 6906              | 0.0000% | 12264          | 0.0000% |
| 32907162       | T   | 53592             | 0.0056% | 6906              | 0.1014% | 12264          | 0.0897% |
| 32907163       | C   | 53592             | 0.0000% | 6906              | 0.0000% | 12264          | 0.0000% |
| 32907164       | A   | 53592             | 0.0000% | 6906              | 0.0000% | 12264          | 0.0163% |
| 32907165       | A   | 53592             | 0.0075% | 6906              | 0.0000% | 12264          | 0.0000% |
| 32907166       | T   | 53592             | 0.0000% | 6906              | 0.0000% | 12264          | 0.0000% |
| 32907167       | G   | 53592             | 0.0037% | 6906              | 0.0145% | 12264          | 0.0082% |
| 32907168       | C   | 53592             | 0.0000% | 6906              | 0.0000% | 12264          | 0.0000% |
| 32907169       | A   | 53592             | 0.0000% | 6906              | 0.0000% | 12264          | 0.0000% |
| 32907170       | A   | 53592             | 0.0243% | 6906              | 0.0000% | 12264          | 0.0163% |
| 32907178       | A   | 53592             | 0.0037% | 6906              | 0.0434% | 12264          | 0.0245% |
| 32907179       | G   | 53592             | 0.0000% | 6906              | 0.0000% | 12264          | 0.0082% |
| 32907180       | G   | 53592             | 0.0019% | 6906              | 0.0290% | 12264          | 0.0000% |
| 32907181       | T   | 53592             | 0.0075% | 6906              | 0.0145% | 12264          | 0.0815% |
| 32907182       | C   | 53592             | 0.0000% | 6906              | 0.0000% | 12264          | 0.0245% |
| 32907183       | A   | 53592             | 0.0000% | 6906              | 0.0000% | 12264          | 0.0000% |
| 32907184       | T   | 53592             | 0.0093% | 6906              | 0.0145% | 12264          | 0.0000% |
| 32907185       | A   | 53592             | 0.0131% | 6906              | 0.0000% | 12264          | 0.0082% |
| 32907186       | T   | 53592             | 0.0000% | 6906              | 0.0000% | 12264          | 0.0000% |
| 32907187       | G   | 53592             | 0.0000% | 6906              | 0.0000% | 12264          | 0.0000% |
| 32907188       | A   | 53592             | 0.0485% | 6906              | 0.0145% | 12264          | 0.0082% |
| 32907189       | C   | 53592             | 0.0000% | 6906              | 0.0579% | 12264          | 0.1060% |
| 32907190       | T   | 53592             | 0.0000% | 6906              | 0.0000% | 12264          | 0.0000% |
| 32907191       | G   | 53592             | 0.0019% | 6906              | 0.0000% | 12264          | 0.0000% |
| 32907192       | A   | 53592             | 0.0000% | 6906              | 0.0000% | 12264          | 0.0000% |
| 32907193       | T   | 53592             | 0.0000% | 6906              | 0.0000% | 12264          | 0.0000% |
| 32907194       | C   | 53592             | 0.0019% | 6906              | 0.0145% | 12264          | 0.0163% |
| 32907195       | C   | 53592             | 0.0056% | 6906              | 0.0000% | 12264          | 0.0082% |
| 32907196       | A   | 53592             | 0.0019% | 6906              | 0.0000% | 12264          | 0.0000% |
| 32907197       | A   | 53592             | 0.0000% | 6906              | 0.0000% | 12264          | 0.0000% |
| 32907198       | A   | 53592             | 0.0299% | 6906              | 0.0145% | 12264          | 0.0082% |
| 32907199       | C   | 53592             | 0.0037% | 6906              | 0.0145% | 12264          | 0.0082% |
| 32907200       | T   | 53592             | 0.0019% | 6906              | 0.0000% | 12264          | 0.0000% |
| 32907201       | T   | 53592             | 0.0000% | 6906              | 0.0000% | 12264          | 0.0000% |
| 32907210       | A   | 53592             | 0.0000% | 6906              | 0.0145% | 12264          | 0.0000% |
| 32907211       | A   | 53592             | 0.0000% | 6906              | 0.0000% | 12264          | 0.0000% |
| 32907212       | A   | 53592             | 0.0205% | 6906              | 0.0000% | 12264          | 0.0408% |
| 32907213       | C   | 53592             | 0.0000% | 6906              | 0.0000% | 12264          | 0.0163% |
| 32907214       | T   | 53592             | 0.0000% | 6906              | 0.0000% | 12264          | 0.0082% |
| 32907215       | G   | 53592             | 0.0000% | 6906              | 0.0000% | 12264          | 0.0245% |
| 32907216       | A   | 53592             | 0.0075% | 6906              | 0.0000% | 12264          | 0.0082% |
| 32907217       | A   | 53592             | 0.0056% | 6906              | 0.0290% | 12264          | 0.0163% |
| 32907218       | G   | 53592             | 0.0000% | 6906              | 0.0000% | 12264          | 0.0000% |
| 32907219       | C   | 53592             | 0.0019% | 6906              | 0.0000% | 12264          | 0.0082% |
| 32907220       | C   | 53592             | 0.0149% | 6906              | 0.0145% | 12264          | 0.0163% |
| 32907221       | T   | 53592             | 0.0019% | 6906              | 0.0145% | 12264          | 0.0082% |
| 32907222       | C   | 53592             | 0.0000% | 6906              | 0.0000% | 12264          | 0.0000% |
| 32907223       | T   | 53592             | 0.0112% | 6906              | 0.0579% | 12264          | 0.0000% |
| 32907224       | G   | 53592             | 0.0000% | 6906              | 0.0000% | 12264          | 0.0000% |
| 32907225       | A   | 53592             | 0.0000% | 6906              | 0.0000% | 12264          | 0.0082% |
| 32907226       | A   | 53592             | 0.0056% | 6906              | 0.0000% | 12264          | 0.0000% |
| 32907227       | A   | 53592             | 0.0131% | 6906              | 0.0145% | 12264          | 0.0245% |
| 32907228       | G   | 53592             | 0.0075% | 6906              | 0.0145% | 12264          | 0.0082% |
| 32907229       | T   | 53592             | 0.0000% | 6906              | 0.0434% | 12264          | 0.0163% |
| 32907230       | G   | 53592             | 0.0000% | 6906              | 0.0000% | 12264          | 0.0082% |
| 32907231       | G   | 53592             | 0.0037% | 6906              | 0.0145% | 12264          | 0.0082% |
| 32907232       | A   | 53592             | 0.0000% | 6906              | 0.0145% | 12264          | 0.0000% |
| 32907233       | C   | 53592             | 0.0000% | 6906              | 0.0000% | 12264          | 0.0000% |
| 32907234       | T   | 53592             | 0.0019% | 6906              | 0.0145% | 12264          | 0.0000% |
| 32907235       | G   | 53592             | 0.0019% | 6906              | 0.0000% | 12264          | 0.0000% |
| 32907236       | G   | 53592             | 0.0056% | 6906              | 0.0145% | 12264          | 0.0000% |
| 32907237       | A   | 53592             | 0.0019% | 6906              | 0.0145% | 12264          | 0.0000% |
| 32907238       | A   | 53592             | 0.0000% | 6906              | 0.0000% | 12264          | 0.0000% |
| 32907239       | A   | 53592             | 0.0019% | 6906              | 0.0290% | 12264          | 0.0489% |
| 32907240       | T   | 53592             | 0.0000% | 6906              | 0.0000% | 12264          | 0.0000% |
| 32907241       | A   | 53592             | 0.0000% | 6906              | 0.0000% | 12264          | 0.0000% |
| 32907242       | C   | 53592             | 0.0056% | 6906              | 0.0290% | 12264          | 0.0163% |
| 32907243       | A   | 53592             | 0.0000% | 6906              | 0.0000% | 12264          | 0.0000% |
| 32907244       | T   | 53592             | 0.0056% | 6906              | 0.0000% | 12264          | 0.0000% |
| 32907245       | A   | 53592             | 0.0000% | 6906              | 0.0000% | 12264          | 0.0000% |
| 32907246       | C   | 53592             | 0.0000% | 6906              | 0.0000% | 12264          | 0.0000% |
| 32907247       | T   | 53592             | 0.0000% | 6906              | 0.0000% | 12264          | 0.0000% |
| 32907248       | G   | 53592             | 0.0000% | 6906              | 0.0145% | 12264          | 0.0245% |
| 32907249       | T   | 53591             | 0.0000% | 6906              | 0.0000% | 12264          | 0.0000% |
| 32907250       | T   | 53591             | 0.0000% | 6906              | 0.0000% | 12264          | 0.0000% |
| 32907251       | T   | 53590             | 0.0019% | 6906              | 0.1014% | 12264          | 0.0734% |
| 32907252       | G   | 53590             | 0.0056% | 6906              | 0.0290% | 12264          | 0.0245% |
| 32907253       | C   | 53590             | 0.0019% | 6906              | 0.0145% | 12264          | 0.0000% |
| 32907254       | T   | 53590             | 0.0037% | 6906              | 0.0000% | 12264          | 0.0082% |
| 32907255       | C   | 53590             | 0.0000% | 6906              | 0.0000% | 12264          | 0.0000% |
| 32907256       | A   | 53588             | 0.0000% | 6906              | 0.0145% | 12264          | 0.0082% |
| 32907257       | C   | 53584             | 0.0112% | 6906              | 0.0000% | 12264          | 0.0000% |
| 32907258       | A   | 53572             | 0.0037% | 6906              | 0.0000% | 12264          | 0.0163% |
| 32907259       | G   | 53545             | 0.0000% | 6906              | 0.0000% | 12264          | 0.0000% |
| 32907260       | A   | 53542             | 0.0019% | 6906              | 0.0290% | 12264          | 0.0000% |
| 32907261       | A   | 53542             | 0.0131% | 6906              | 0.0145% | 12264          | 0.0245% |
| 32907262       | G   | 53541             | 0.0000% | 6906              | 0.0145% | 12264          | 0.0000% |
| 32907263       | G   | 53541             | 0.0019% | 6906              | 0.0145% | 12264          | 0.0163% |
| 32907264       | A   | 53538             | 0.0112% | 6906              | 0.0434% | 12264          | 0.0163% |
| 32907265       | G   | 53537             | 0.0019% | 6906              | 0.0145% | 12264          | 0.0163% |
| 32907266       | G   | 53537             | 0.0262% | 6906              | 0.1158% | 12264          | 0.0734% |
| 32907267       | A   | 53537             | 0.0037% | 6906              | 0.0000% | 12264          | 0.0082% |
| 32907268       | C   | 53537             | 0.0448% | 6906              | 0.0145% | 12264          | 0.0163% |
| 32907269       | T   | 53536             | 0.0318% | 6906              | 0.0145% | 12264          | 0.0000% |
| 32907270       | C   | 53535             | 0.0411% | 6906              | 0.0000% | 12264          | 0.0082% |
| 32907271       | C   | 53535             | 0.2821% | 6906              | 0.1014% | 12263          | 0.0815% |
| 32907272       | T   | 53535             | 0.1476% | 6906              | 0.0000% | 12263          | 0.0163% |
| 32907273       | T   | 53535             | 0.1662% | 6906              | 0.1158% | 12263          | 0.0652% |
| 32907274       | A   | 53535             | 0.0411% | 6906              | 0.0000% | 12263          | 0.0245% |
| 32907275       | T   | 53534             | 0.0747% | 6906              | 0.0000% | 12263          | 0.0163% |
